# Supplementary material for: Effects of Floods on Zooplankton Community Structure in the Huayanghe Lake
Source: MDPI journal article supplement (doi:10.3390/d15020250), 2023-02-09
Supplement: s1 [file s1]

**Table S1.** Zooplankton community composition in the Huayanghe Lake

| Family          | Genus                | Species                                                       |
|-----------------|----------------------|---------------------------------------------------------------|
| Philodinidae    | <i>Rotaria</i>       | <i>Rotaria tardigrada</i> (Ehrenberg, 1830)                   |
| Brachionidae    | <i>Brachionus</i>    | <i>Brachionus calyciflorus</i> s.l. Pallas, 1766              |
|                 |                      | <i>Brachionus forficula</i> Wierzejski, 1891                  |
|                 |                      | <i>Brachionus budapestinensis</i> Daday, 1885                 |
|                 |                      | <i>Brachionus urceolaris</i> Müller, 1773                     |
|                 |                      | <i>Brachionus diversicornis</i> (Daday, 1883)                 |
|                 | <i>Keratella</i>     | <i>Keratella cochlearis</i> s.l. (Gosse, 1851)                |
|                 |                      | <i>Keratella quadrata</i> s.l. (Müller, 1786)                 |
|                 |                      | <i>Keratella valga</i> (Ehrenberg, 1834)                      |
|                 | <i>Notholca</i>      | <i>Notholca labis</i> Gosse, 1887                             |
|                 | <i>Plationus</i>     | <i>Plationus patulus</i> (Müller, 1786)                       |
| Lecanidae       | <i>Euchlanis</i>     | <i>Euchlanis triquetra</i> Ehrenberg, 1838                    |
|                 | <i>Lecane</i>        | <i>Lecane unguolata</i> (Gosse, 1887)                         |
|                 |                      | <i>Lecane bulla</i> (Gosse, 1851)                             |
|                 |                      | <i>Lecane furcata</i> (Murray, 1913)                          |
| Asplanchnidae   | <i>Asplanchna</i>    | <i>Asplanchna priodonta</i> Gosse, 1850                       |
| Gastropodidae   | <i>Ascomorpha</i>    | <i>Ascomorpha ecaudis</i> Perty, 1850                         |
| Trichocercidae  | <i>Diurella</i>      | <i>Trichocerca stylata</i> (Gosse, 1851)                      |
|                 |                      | <i>Trichocerca rousseleti</i> (Voigt, 1902)                   |
|                 | <i>Trichocerca</i>   | <i>Trichocerca cylindrica</i> (Imhof, 1891)                   |
|                 |                      | <i>Trichocerca capucina</i> (Wierzejski & Zacharias, 1893)    |
|                 |                      | <i>Trichocerca lophoessa</i> (Gosse, 1886)                    |
|                 |                      | <i>Trichocerca pusilla</i> (Jennings, 1903)                   |
| Synchaetidae    | <i>Polyarthra</i>    | <i>Polyarthra euryptera</i> Wierzejski, 1891                  |
|                 |                      | <i>Polyarthra</i> sp. Ehrenberg, 1834                         |
| Testudinellidae | <i>Filinia</i>       | <i>Filinia terminalis</i> (Plate, 1886)                       |
| Sididae         | <i>Diaphanosoma</i>  | <i>Diaphanosoma brachyurum</i> (Liévin, 1848)                 |
|                 |                      | <i>Diaphanosoma australiensis</i> Korovchinsky, 1981          |
|                 |                      | <i>Diaphanosoma sarsi</i> Richard, 1894                       |
|                 |                      | <i>Diaphanosoma voltzi</i> Stingelin, 1905                    |
|                 |                      | <i>Diaphanosoma excisum</i> G.O.Sars, 1885                    |
| Daphniidae      | <i>Daphnia</i>       | <i>Daphnia pulex</i> Leydig, 1860                             |
| Moinidae        | <i>Moina</i>         | <i>Moina micrura</i> Kurz, 1875                               |
| Bosminidae      | <i>Bosmina</i>       | <i>Bosmina (Bosmina) longirostris</i> (O.F.Müller, 1785)      |
|                 |                      | <i>Bosmina (Eubosmina) coregoni</i> Baird, 1857               |
|                 |                      | <i>Bosmina (Sinobosmina) fatalis fatalis</i> Burckhardt, 1924 |
|                 | <i>Bosminopsis</i>   | <i>Bosminopsis deitersi</i> Richard, 1895                     |
|                 | <i>Camptocercus</i>  | <i>Camptocercus rectirostris</i> Schoedler, 1862              |
| Chydoridae      | <i>Graptoleberis</i> | <i>Graptoleberis testudinaria</i> (Fischer, 1851)             |
|                 | <i>Alona</i>         | <i>Alona guttata</i> G.O.Sars, 1862                           |
| Leptodoridae    | <i>Leptodora</i>     | <i>Leptodora kindti</i> (Focke, 1844)                         |

---

|                   |                      |                                                            |
|-------------------|----------------------|------------------------------------------------------------|
| Centropagidae     | <i>Sinocalanus</i>   | <i>Sinocalanus doerrii</i> (Brehm, 1909)                   |
| Laophontidae      | <i>Onychocamptus</i> | <i>Onychocamptus mohammed</i> (Blanchard et Richard, 1891) |
| Oithonidae        | <i>Limnoithona</i>   | <i>Limnoithona sinensis</i> (Burckhardt, 1913)             |
| Cyclopidae        | <i>Eucyclops</i>     | <i>Eucyclops serrulatus</i> (Fischer, 1851)                |
|                   | <i>Cyclops</i>       | <i>Cyclops vicinus</i> Uljanin, 1875                       |
|                   | <i>Microcyclops</i>  | <i>Microcyclops varicans</i> (Sars G.O., 1863)             |
|                   |                      | <i>Microcyclops intermedius</i> Shen et Tai, 1964          |
|                   | <i>Mesocyclops</i>   | <i>Mesocyclops leuckarti</i> (Claus, 1857)                 |
|                   | <i>Thermocyclops</i> | <i>Thermocyclops hyalinus hyalinus</i> (Rehberg, 1880)     |
|                   |                      | <i>Thermocyclops taihokuensis</i> Harada, 1931             |
| Pseudodiaptomidae | <i>Schmackeria</i>   | <i>Schmackeria inopinus</i> (Burckhardt, 1913)             |

---
